# Supplementary material
Source: PubMed Central journal article supplement (PMC3744226)
Supplement: NIHMS499600-supplement-Supplementary_Table_1.pdf [file NIHMS499600-supplement-Supplementary_Table_1.pdf]

**Supplementary Table 1.** Sensitivity analysis of different tag generations methods for spectra of charge 3+ acquired using different mass spectrometry instruments. The analysis was performed with charge state determination function of InsPecT.

| <b>Instrument</b> | <b># of Spectra</b> | <b>Sensitivity (%)</b> |                 |                 |                          |                          |
|-------------------|---------------------|------------------------|-----------------|-----------------|--------------------------|--------------------------|
|                   |                     | <b>[01]</b>            | <b>(03)(12)</b> | <b>(01)(23)</b> | <b>(03)(12),<br/>1.0</b> | <b>(01)(23),<br/>1.0</b> |
| QTOF              | 215                 | 88.4                   | 92.1            | 97.2            | 92.1                     | 94.0                     |
| LTQ               | 748                 | 93.9                   | 95.6            | 96.5            | 95.6                     | 96.7                     |
| LCQ               | 454                 | 78.0                   | 84.1            | 80.9            | 85.0                     | 83.7                     |
| Agilent           | 1585                | 78.2                   | 81.6            | 82.2            | 81.8                     | 83.7                     |
